# Supplementary material
Source: MDPI journal article supplement (https://www.mdpi.com/2227-9717/10/2/191)
Supplement: s1 [file s1]

# Supplementary Materials: Isolation and Purification of Mustard Glucosinolates by Macroporous Anion-Exchange Resin: Process Optimization and Kinetics' Modelling

Mathieu Hebert, Emmanuel Serra, Eugène Vorobiev and Houcine Mhemdi

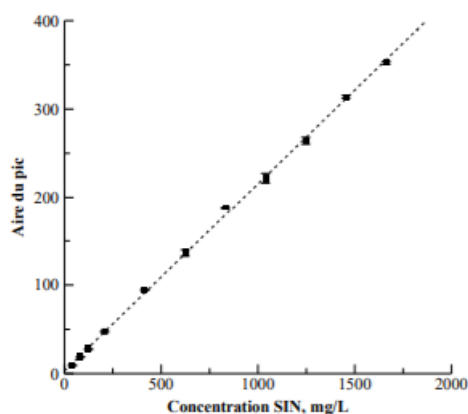

**Figure S1.** Calibration curve established for sinigrin quantification.
